# Supplementary material for: Hemostatic Factors and Risk of Coronary Heart Disease in General Populations: New Prospective Study and Updated Meta-Analyses
Source: PubMed Central journal article supplement (PMC3567058; doi:10.1371/journal.pone.0055175), 2013-02-07

**Figure S1.** Flow-chart of the Reykjavik Study.

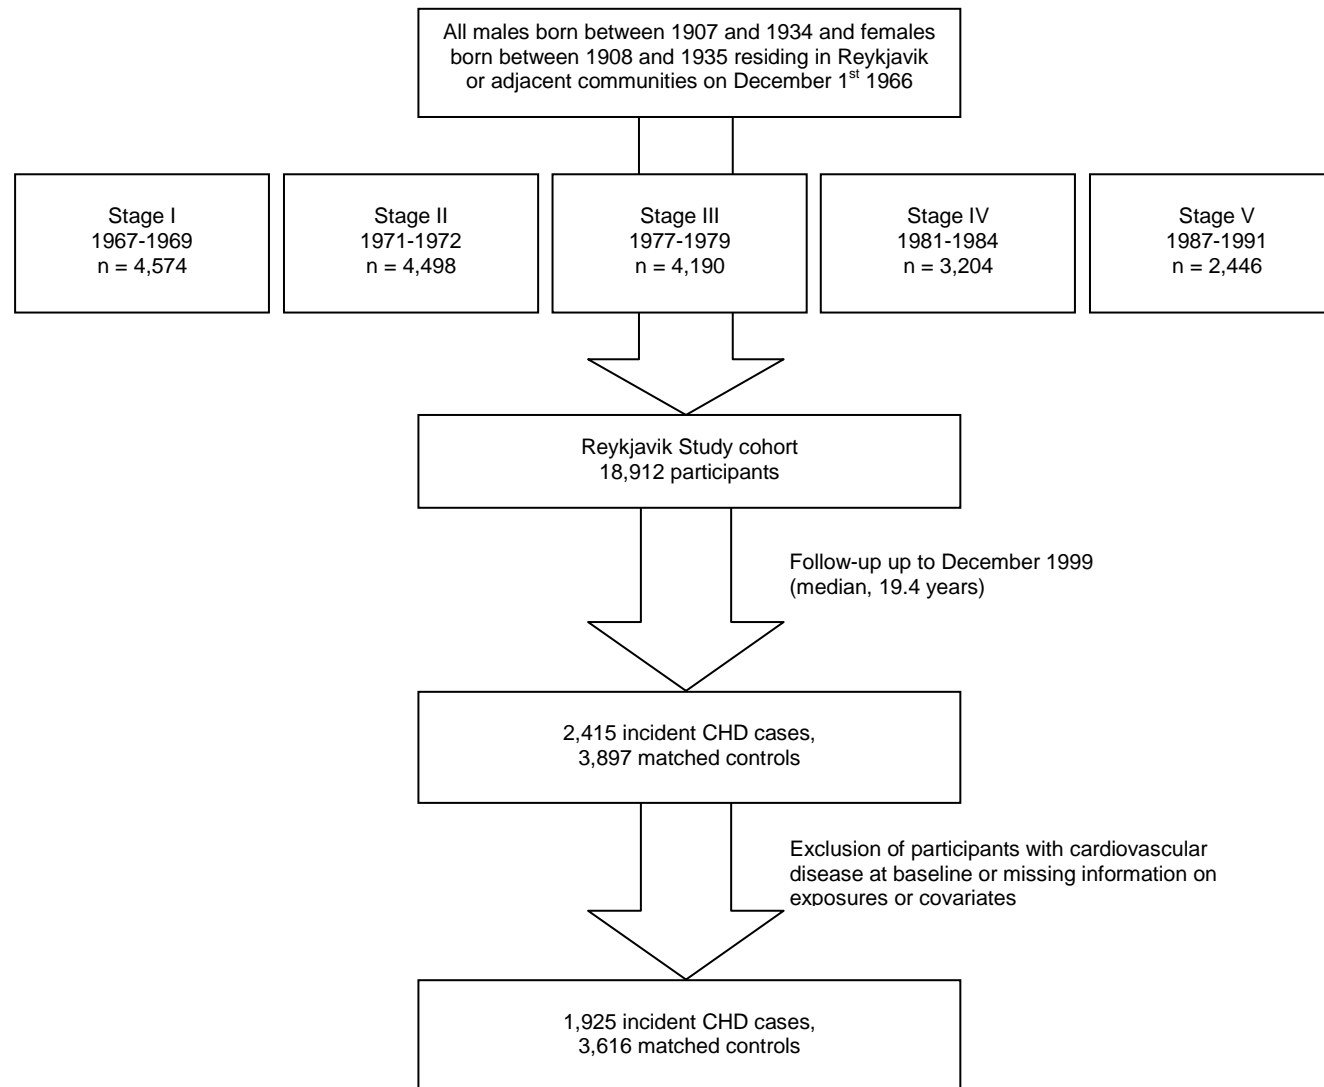

Supplement: pone.0055175.s001.pdf [file pone.0055175.s001.pdf]
