# Supplementary material for: Hemostatic Factors and Risk of Coronary Heart Disease in General Populations: New Prospective Study and Updated Meta-Analyses
Source: PubMed Central journal article supplement (PMC3567058; doi:10.1371/journal.pone.0055175), 2013-02-07
Supplement: pone.0055175.s004.pdf [file pone.0055175.s004.pdf]

**Figure S4.** Cross-sectional correlates of baseline levels of D-dimer.

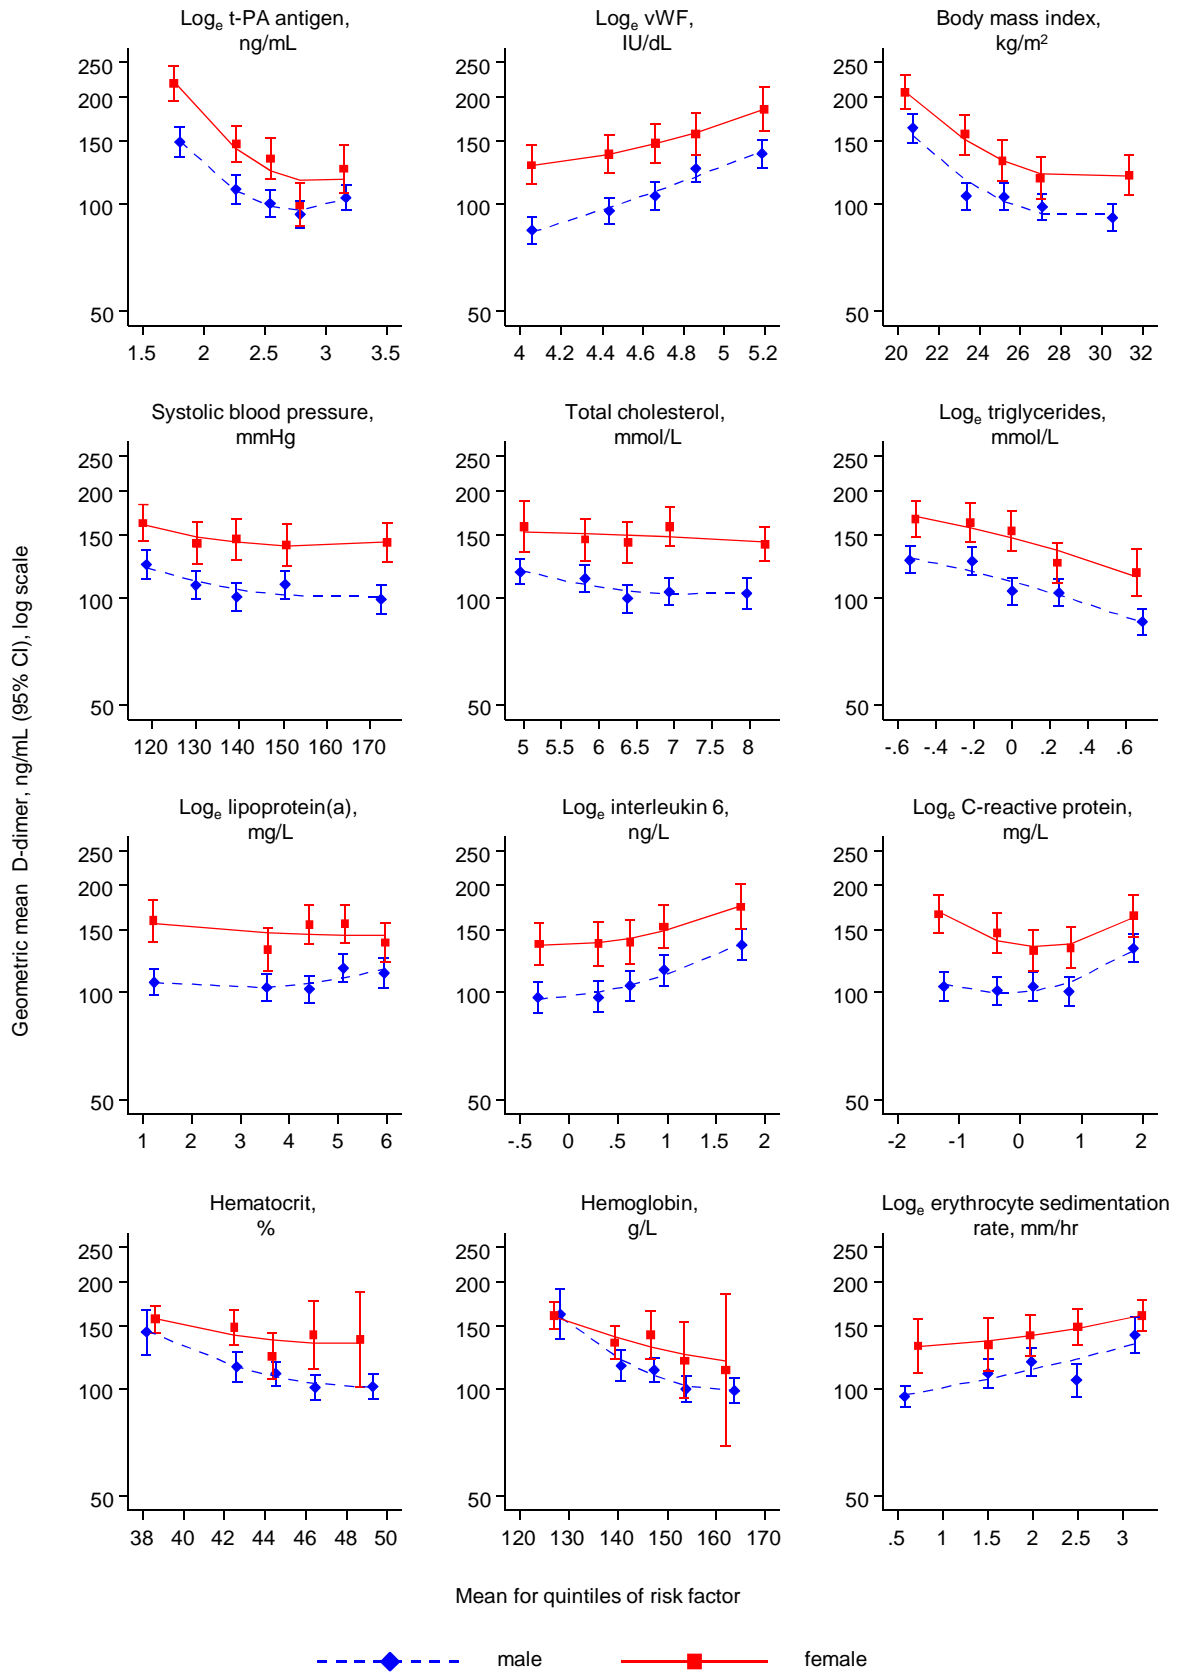

Response means are adjusted to age 55
