# Supplementary material for: Hemostatic Factors and Risk of Coronary Heart Disease in General Populations: New Prospective Study and Updated Meta-Analyses
Source: PubMed Central journal article supplement (PMC3567058; doi:10.1371/journal.pone.0055175), 2013-02-07
Supplement: pone.0055175.s006.pdf [file pone.0055175.s006.pdf]

**Figure S6.** Explorative analysis of effect modification of the associations of baseline levels of t-PA antigen, D-dimer and VWF with coronary heart disease risk in the Reykjavik study.

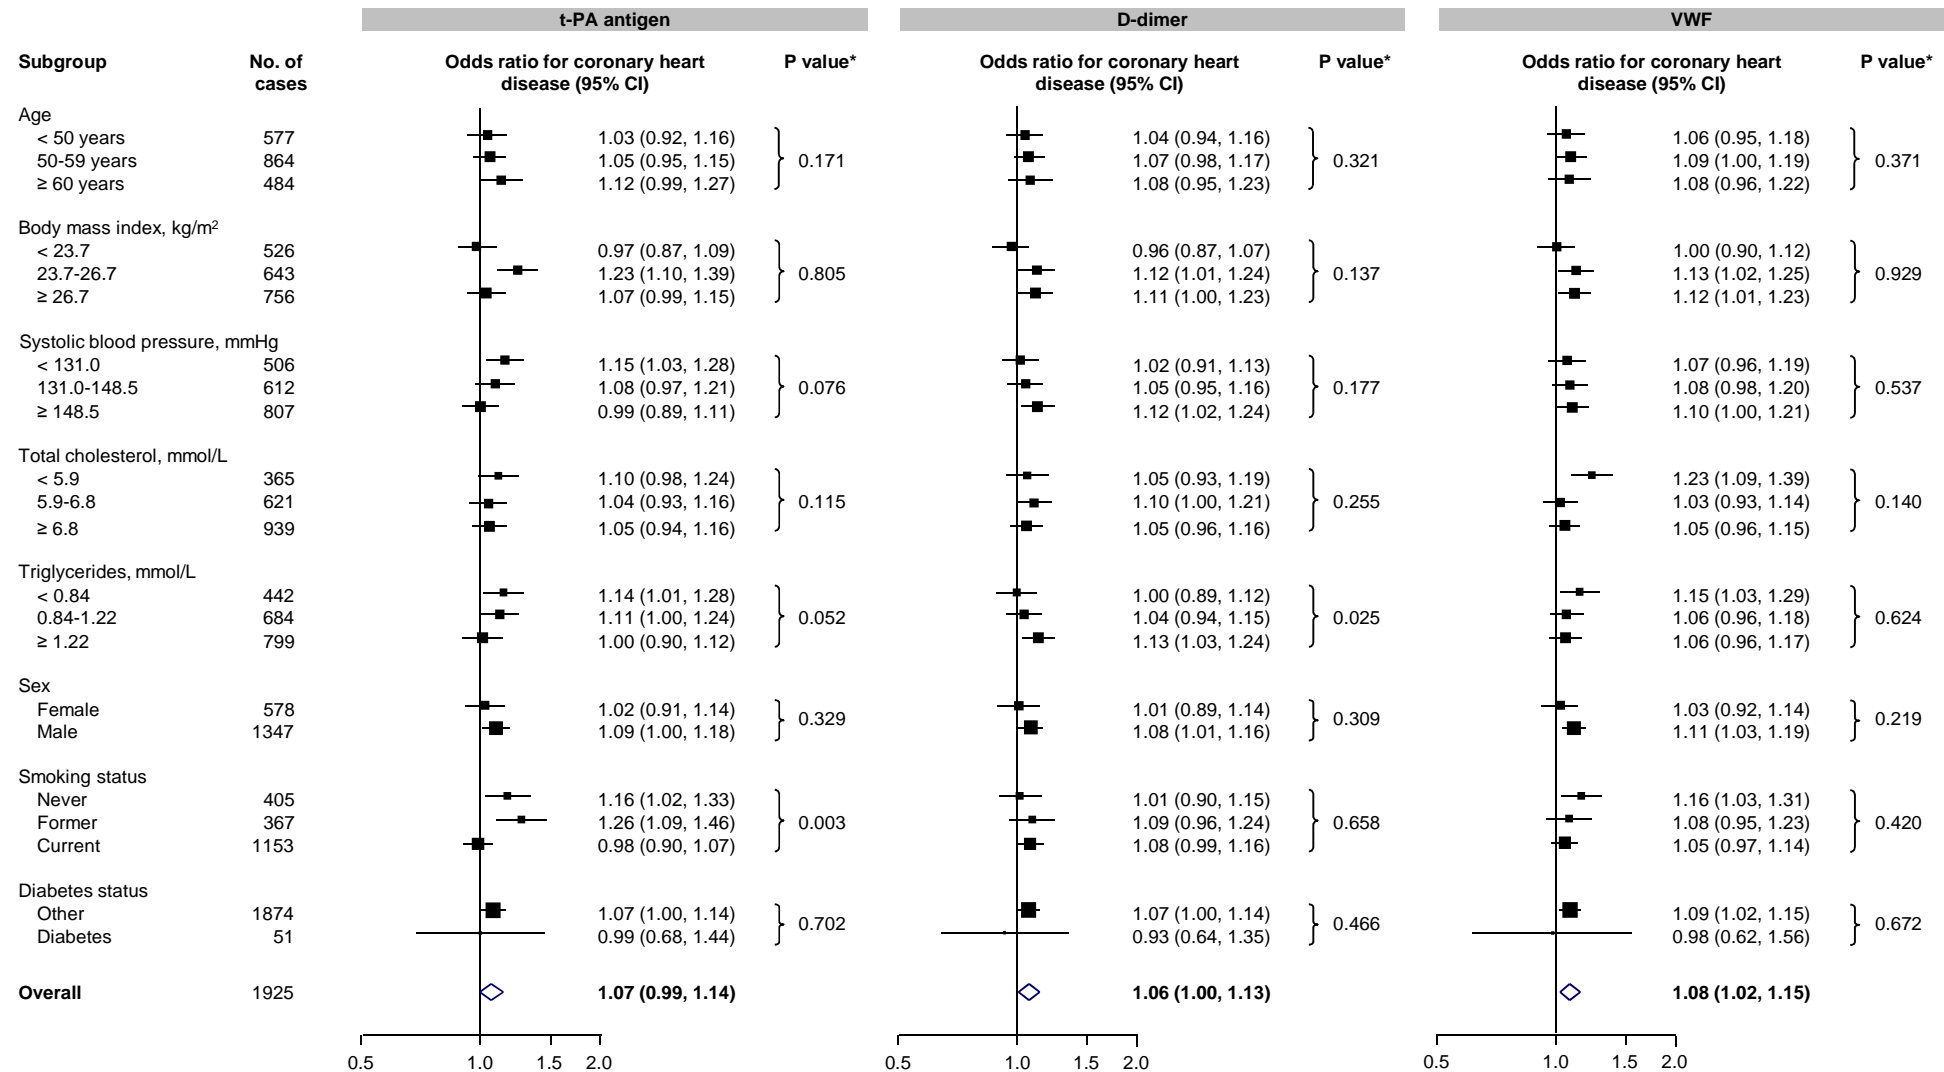

Continuous variables were categorized based on tertile cut-offs in controls. All models are adjusted for age, sex, period of recruitment, smoking status, body mass index, systolic blood pressure, history of diabetes at baseline, total cholesterol, and log<sub>e</sub> triglycerides. \*P values were calculated using likelihood ratio tests comparing models with and without interaction terms.
