# Supplementary material for: Hemostatic Factors and Risk of Coronary Heart Disease in General Populations: New Prospective Study and Updated Meta-Analyses
Source: PubMed Central journal article supplement (PMC3567058; doi:10.1371/journal.pone.0055175), 2013-02-07
Supplement: pone.0055175.s011.pdf [file pone.0055175.s011.pdf]

**Table S1.** Comparison of baseline characteristics of coronary heart disease cases, randomly selected controls and the overall Reykjavik cohort.

| Variable<br>(Mean or %)   | Nested case-control study                     |                         | Overall Reykjavik<br>cohort |
|---------------------------|-----------------------------------------------|-------------------------|-----------------------------|
|                           | Coronary heart<br>disease cases<br><br>n=1925 | Controls*<br><br>n=3616 |                             |
| Age, years*               | 54.2                                          | 55.2                    | 52.8                        |
| Male, %*                  | 70%                                           | 67%                     | 48%                         |
| Current smoker, %         | 60%                                           | 48%                     | 47%                         |
| Diabetes, %               | 3%                                            | 2%                      | 2%                          |
| SBP, mmHg                 | 146.7                                         | 141.9                   | 138.3                       |
| BMI, kg/m <sup>2</sup>    | 26.0                                          | 25.4                    | 25.4                        |
| Total cholesterol, mmol/L | 6.9                                           | 6.4                     | 6.5                         |

\*Controls were matched to coronary heart disease cases by sex and age (in five-year age bands) and therefore differ from the remainder of the Reykjavik cohort.
